# Supplementary material for: Removal of all ovarian tissue versus conserving ovarian tissue at time of hysterectomy in premenopausal patients with benign disease: study using routine data and data linkage
Source: PubMed Central journal article supplement (PMC5421461; doi:10.1136/bmj.j372), 2017-02-06

## SUPPLEMENTARY FIGURE

Trends in hysterectomy ages 35-45 over the study period, overall and by operation type.

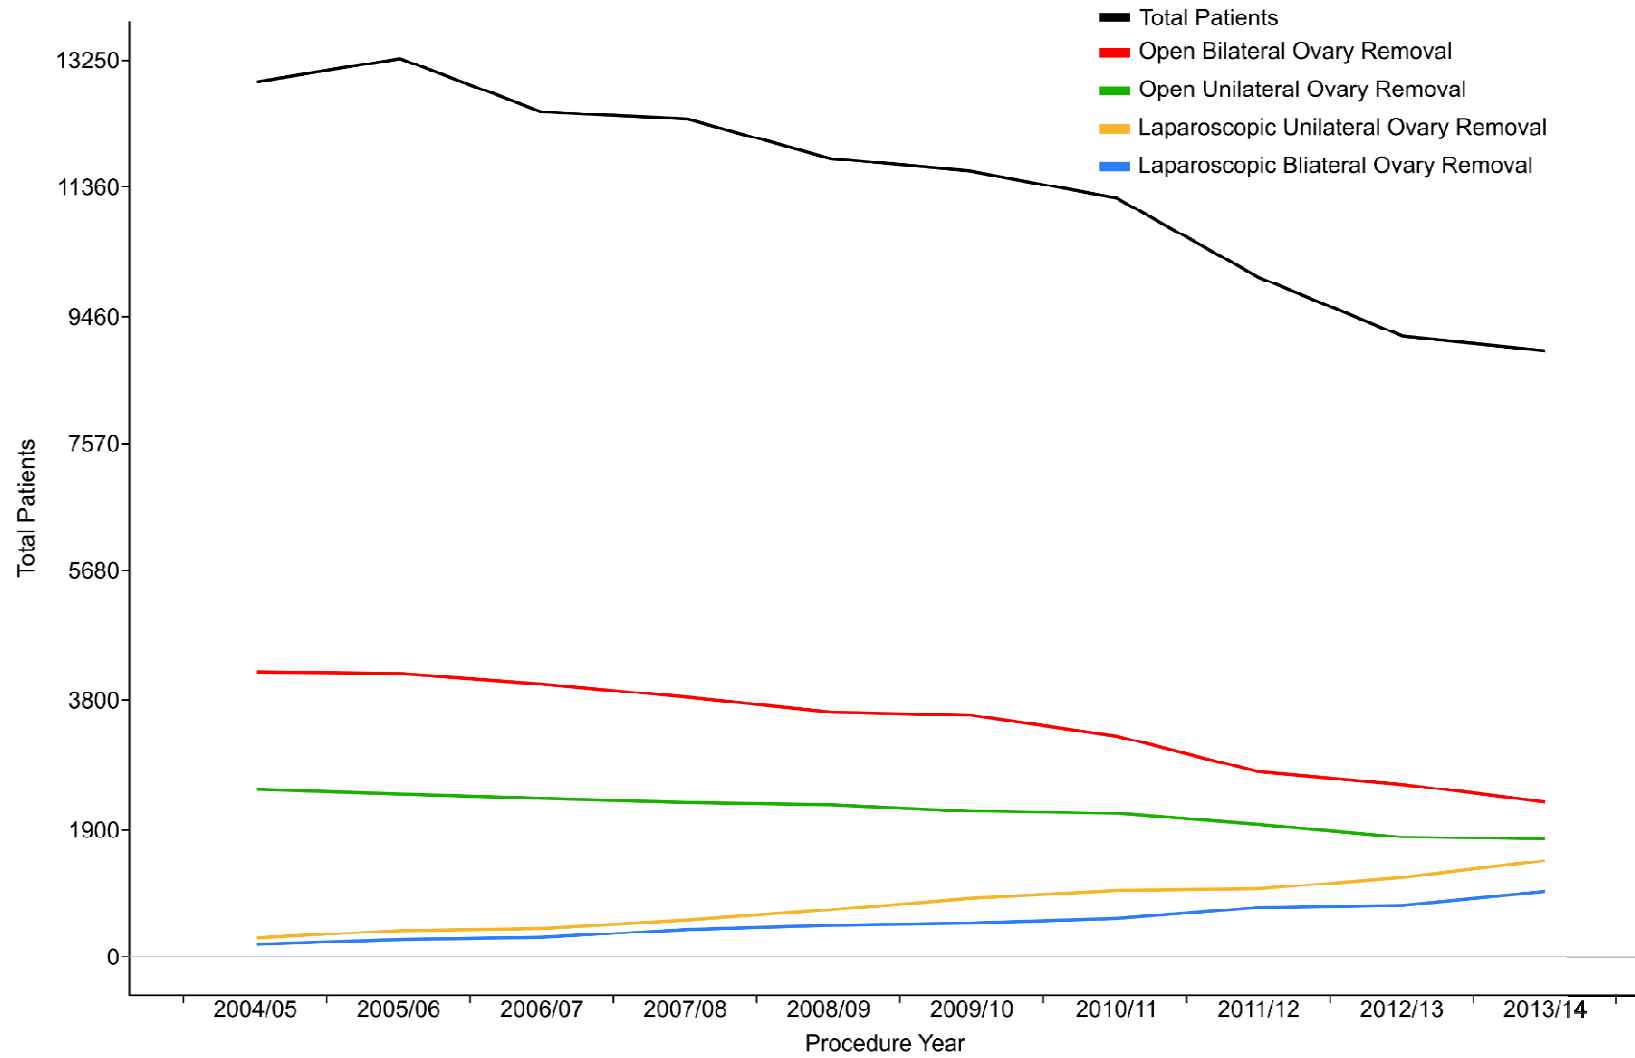

Supplement: mytj034990.ww1.pdf [file mytj034990.ww1.pdf]
